# Supplementary material for: Ultra-high-field imaging reveals increased whole brain connectivity underpins cognitive strategies that attenuate pain
Source: eLife. 2020 Sep 2;9:e55028. doi: 10.7554/eLife.55028 (PMC7498261; doi:10.7554/eLife.55028)
Supplement: Source data 6. [file elife-55028-data6.xlsx]

## Sheet: Sheet1
		#	123	198	210	296	323	329	353
123	Area STGa (STGa) L	1	0	0	-3.59	0	0	0	0
198	Area 55b (55b) R	1	0	0	0	0	0	3.48	0
210	Primary Auditory Cortex (A1) R	1	-3.59	0	0	0	0	0	0
296	Pirform Cortex (Pir) R	1	0	0	0	0	3.55	0	0
323	Area PHT (PHT) R	2	0	0	0	3.55	0	0	3.53
329	Area PGp (PGp) R	1	0	3.48	0	0	0	0	0
353	AreaPosteriorInsular1 (PoI1) R	1	0	0	0	0	3.53	0	0
