# Supplementary material for: Ultra-high-field imaging reveals increased whole brain connectivity underpins cognitive strategies that attenuate pain
Source: eLife. 2020 Sep 2;9:e55028. doi: 10.7554/eLife.55028 (PMC7498261; doi:10.7554/eLife.55028)
Supplement: Source data 7. [file elife-55028-data7.xlsx]

## Sheet: Sheet1
		#	5	71	102	109	167	219	273	292	327	328	329
5	Third Visual Area (V3) L	2	0	0	0	0	0	3.58	0	0	0	3.72	0
71	Area 9 Posterior (9p) L	1	0	0	0	0	0	0	3.64	0	0	0	0
102	Area OP2-3/VS (OP2-3) L	1	0	0	0	0	0	0	0	-3.6	0	0	0
109	Middle Insular Area (MI) L	1	0	0	0	0	0	0	0	0	0	0	3.62
167	AreaPosteriorInsular1 (PoI1) L	1	0	0	0	0	0	0	0	0	3.8	0	0
219	Area ventral 23 a+b (v23ab) R	1	3.58	0	0	0	0	0	0	0	0	0	0
273	Area 9 anterior (9a) R	1	0	3.64	0	0	0	0	0	0	0	0	0
292	PosteriorInsular Area2 (PoI2) R	1	0	0	-3.6	0	0	0	0	0	0	0	0
327	AreaTemporoParietoOccipitalJunction3 (TPOJ3) R	1	0	0	0	0	3.8	0	0	0	0	0	0
328	Dorsal Transitional Visual Area (DVT) R	1	3.72	0	0	0	0	0	0	0	0	0	0
329	Area PGp (PGp) R	1	0	0	0	3.62	0	0	0	0	0	0	0
